# Supplementary material for: Clinical Relevance of Patient-Derived Organoid of Surgically Resected Lung Cancer as an In Vitro Model for Biomarker and Drug Testing
Source: PubMed Central journal article supplement — JTO Clin Res Rep. 2023 Jul 27;4(9):100554. doi: 10.1016/j.jtocrr.2023.100554 (PMC10480534; doi:10.1016/j.jtocrr.2023.100554), 2023-07-27
Supplement: mmc1.pdf [file mmc1.pdf]

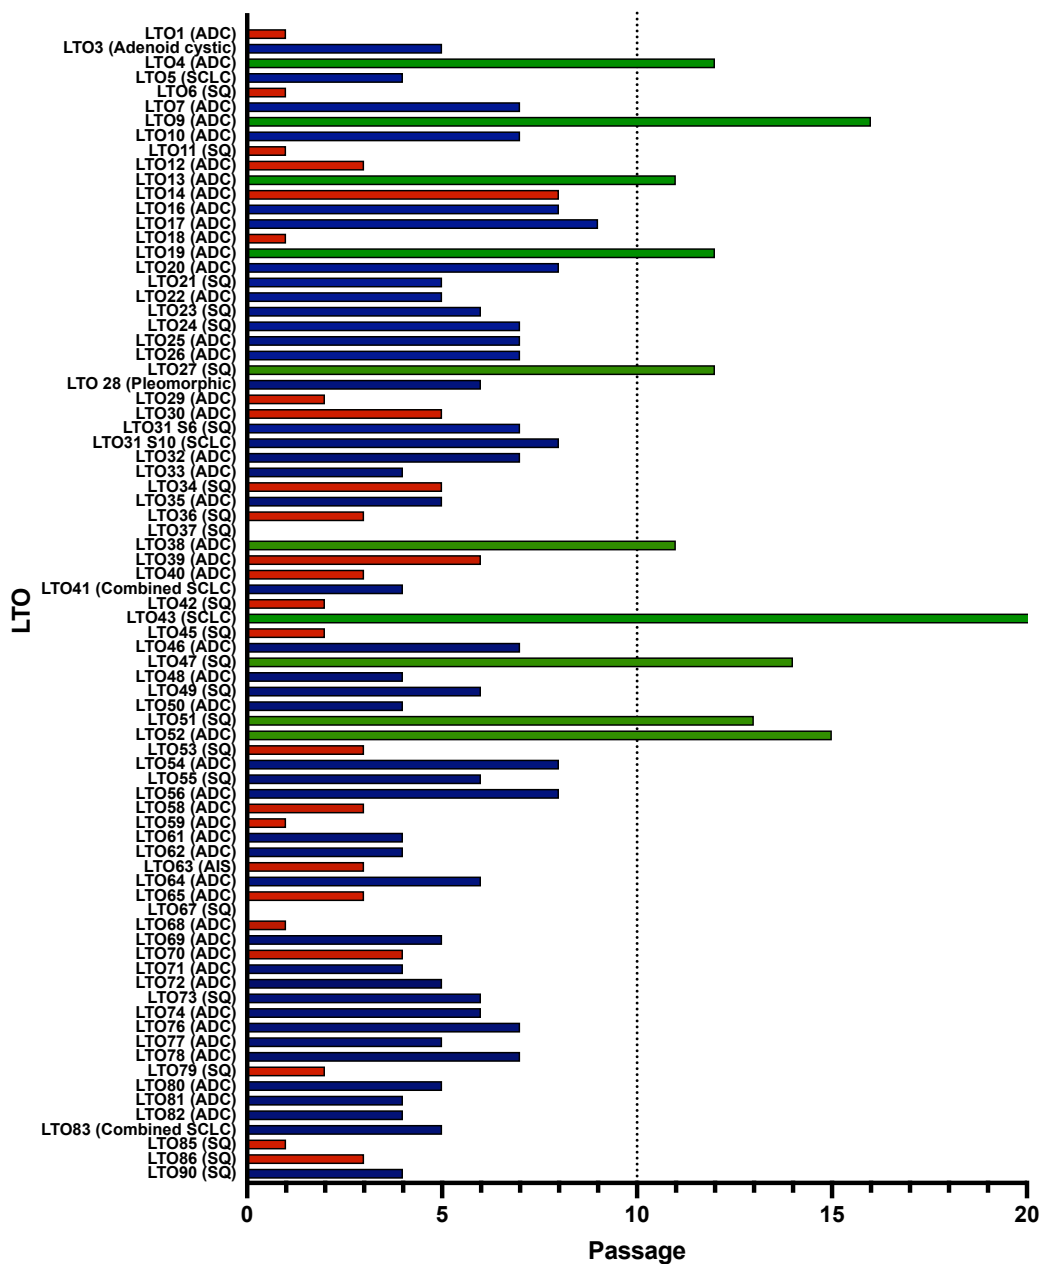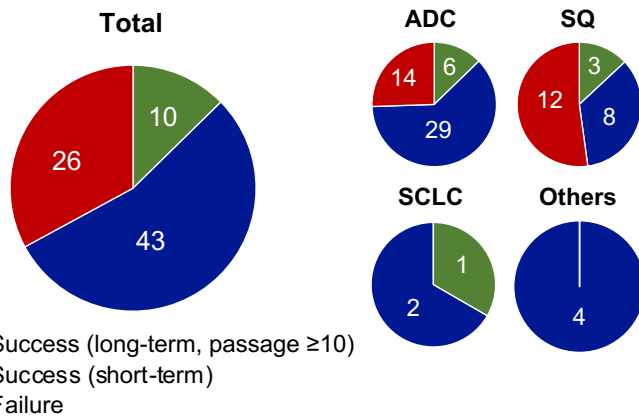

**Figure S1.** Swimmer plot of passage number in lung tumor organoid culture (upper) and pie chart of successfully established lung tumour organoids (lower). Green, blue, and red indicates long-term (passage  $\geq 10$ ), short-term, and failure models, respectively. The criteria are described in the Materials and Methods. LTO, lung tumor organoid; ADC, adenocarcinoma; SQ, squamous cell carcinoma; SCLC, small cell lung cancer.

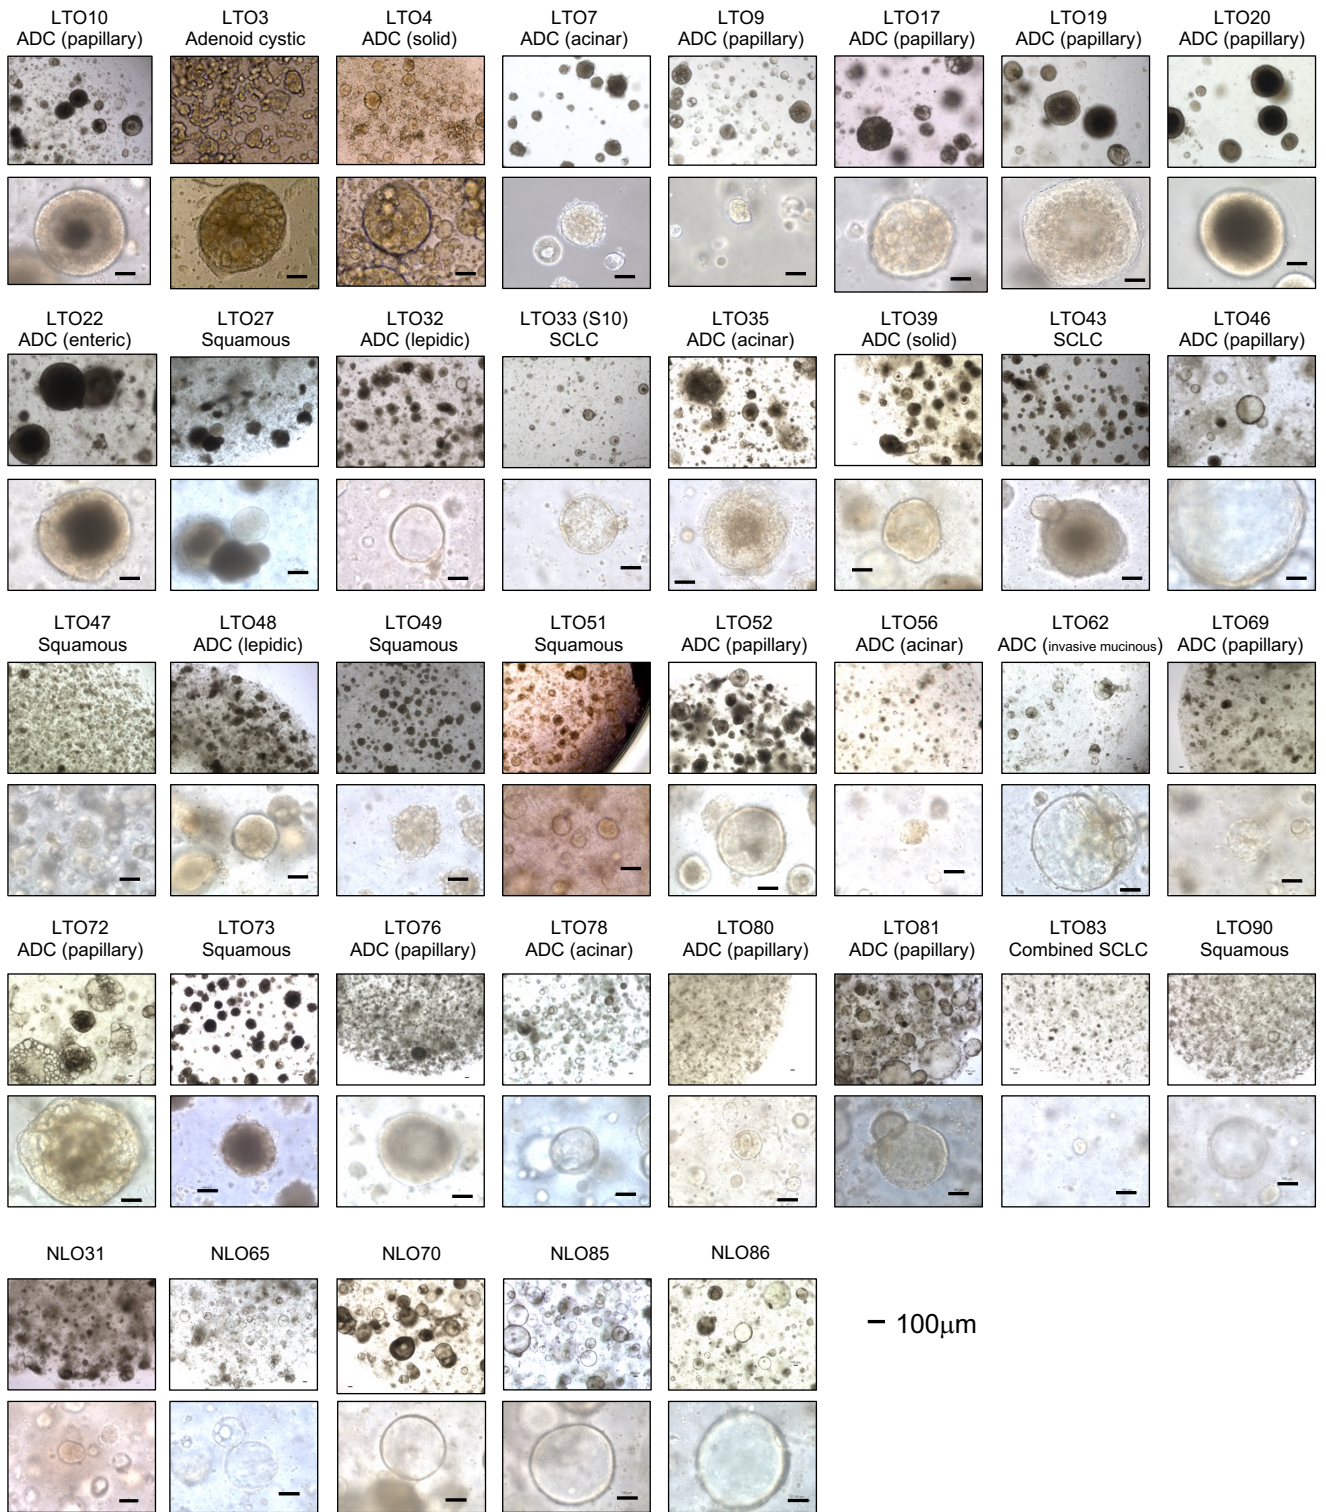

**Figure S2.** Bright field microscopic images besides displayed lung tumour organoids (LTOs) in Figure 1. Scale bars in high-power field indicate 100µm. DC; adenocarcinoma, SQ; squamous cell carcinoma, SCLC; small cell lung cancer, NLO; normal lung organoid.

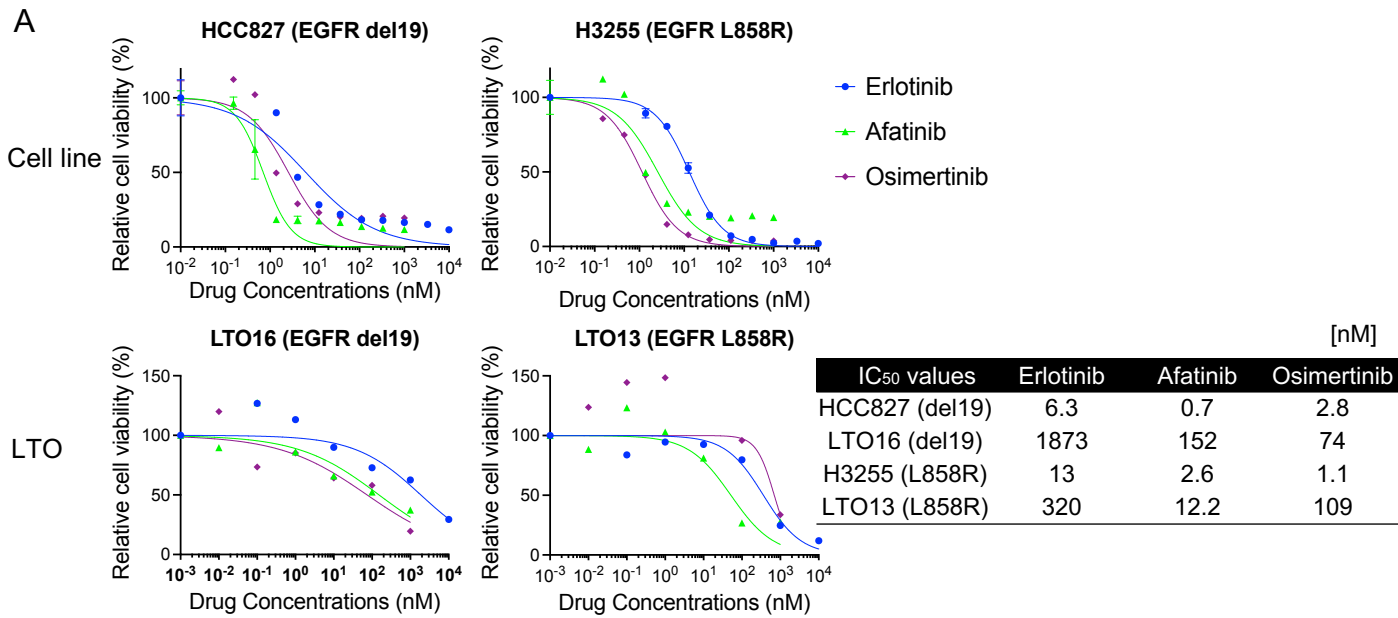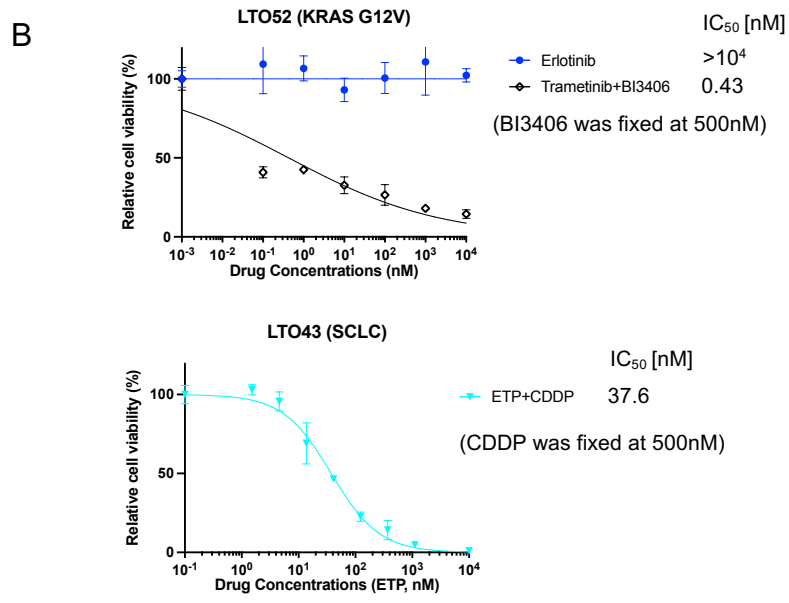

**Figure S3.** Feasibility of lung tumor organoids (LTOs) for drug sensitivity test.

A. Drug sensitivity tests of LTOs and cell lines harbouring *EGFR* exon 19 deletion or *EGFR* exon 21 L858R mutation to EGFR-TKIs. LTOs were sensitive to EGFR-TKIs but the IC<sub>50</sub> values were higher in LTOs than in cell lines.

B. Drug sensitivity test of LTO52 derived from KRAS G12V mutant lung adenocarcinoma and LTO43 derived from small cell lung cancer.

ETP, etoposide; CDDP, cisplatin.
